# Supplementary material for: Attitude and Acceptance towards COVID-19 Booster Doses among Literacy Advantaged Population in Pakistan: A Cross-Sectional Study
Source: MDPI journal article supplement (doi:10.3390/vaccines11071238), 2023-07-14
Supplement: s1 [file s1]

PHDs different results

| Work Status |            |           |         |               |                       |
|-------------|------------|-----------|---------|---------------|-----------------------|
|             |            | Frequency | Percent | Valid Percent | Cumulative<br>Percent |
| Valid       | Employed   | 29        | 54.7    | 54.7          | 54.7                  |
|             | Retired    | 6         | 11.3    | 11.3          | 66.0                  |
|             | Unemployed | 18        | 34.0    | 34.0          | 100.0                 |
|             | Total      | 53        | 100.0   | 100.0         |                       |

| Interactive Profession |        |           |         |               |                    |
|------------------------|--------|-----------|---------|---------------|--------------------|
|                        |        | Frequency | Percent | Valid Percent | Cumulative Percent |
| Valid                  | No     | 6         | 11.3    | 20.7          | 20.7               |
|                        | Yes    | 23        | 43.4    | 79.3          | 100.0              |
|                        | Total  | 29        | 54.7    | 100.0         |                    |
| Missing                | System | 24        | 45.3    |               |                    |
| Total                  |        | 53        | 100.0   |               |                    |

| Profession |                             |           |         |               |                    |
|------------|-----------------------------|-----------|---------|---------------|--------------------|
|            |                             | Frequency | Percent | Valid Percent | Cumulative Percent |
| Valid      | Health or Allied Healthcare | 13        | 24.5    | 56.5          | 56.5               |
|            | Others                      | 10        | 18.9    | 43.5          | 100.0              |
|            | Total                       | 23        | 43.4    | 100.0         |                    |
| Missing    | System                      | 30        | 56.6    |               |                    |
| Total      |                             | 53        | 100.0   |               |                    |

92.5% had vaccine

| Receipt COVID Vaccine |          |           |         |               |                    |
|-----------------------|----------|-----------|---------|---------------|--------------------|
|                       |          | Frequency | Percent | Valid Percent | Cumulative Percent |
| Valid                 | Not Sure | 1         | 1.9     | 1.9           | 1.9                |
|                       | No       | 3         | 5.7     | 5.7           | 7.5                |

|       |    |       |       |       |
|-------|----|-------|-------|-------|
| Yes   | 49 | 92.5  | 92.5  | 100.0 |
| Total | 53 | 100.0 | 100.0 |       |

41.5% had all three administered

| Dose of vaccine        |           |         |               |                    |
|------------------------|-----------|---------|---------------|--------------------|
|                        | Frequency | Percent | Valid Percent | Cumulative Percent |
| All of them            | 21        | 39.6    | 42.9          | 42.9               |
| 1st Dose               | 2         | 3.8     | 4.1           | 46.9               |
| Valid 2nd Dose/Booster | 25        | 47.2    | 51.0          | 98.0               |
| 3rd Dose/Booster       | 1         | 1.9     | 2.0           | 100.0              |
| Total                  | 49        | 92.5    | 100.0         |                    |
| Missing System         | 4         | 7.5     |               |                    |
| Total                  | 53        | 100.0   |               |                    |

34% had already had covid infection

| Previous COVID Infection |           |         |               |                    |
|--------------------------|-----------|---------|---------------|--------------------|
|                          | Frequency | Percent | Valid Percent | Cumulative Percent |
| Not Sure                 | 9         | 17.0    | 18.4          | 18.4               |
| Valid No                 | 22        | 41.5    | 44.9          | 63.3               |
| Yes                      | 18        | 34.0    | 36.7          | 100.0              |
| Total                    | 49        | 92.5    | 100.0         |                    |
| Missing System           | 4         | 7.5     |               |                    |
| Total                    | 53        | 100.0   |               |                    |

15.1% reported any side effect of 3<sup>rd</sup> dose of vaccine

| Side Effects 3rd Dose |           |         |               |                    |
|-----------------------|-----------|---------|---------------|--------------------|
|                       | Frequency | Percent | Valid Percent | Cumulative Percent |
| No                    | 41        | 77.4    | 83.7          | 83.7               |
| Valid Yes             | 8         | 15.1    | 16.3          | 100.0              |
| Total                 | 49        | 92.5    | 100.0         |                    |
| Missing System        | 4         | 7.5     |               |                    |
| Total                 | 53        | 100.0   |               |                    |

9.4% responded that 3<sup>rd</sup> dose of vaccine resulted in most side effects

**Dose with more side effects**

|                | Frequency | Percent | Valid Percent | Cumulative Percent |
|----------------|-----------|---------|---------------|--------------------|
| Valid 1        | 1         | 1.9     | 12.5          | 12.5               |
| Valid 2        | 2         | 3.8     | 25.0          | 37.5               |
| Valid 3        | 5         | 9.4     | 62.5          | 100.0              |
| Total          | 8         | 15.1    | 100.0         |                    |
| Missing System | 45        | 84.9    |               |                    |
| Total          | 53        | 100.0   |               |                    |

30.2% had already had a jab. 18.9% are ready to have it

**Booster Dose Acceptance**

|                               | Frequency | Percent | Valid Percent | Cumulative Percent |
|-------------------------------|-----------|---------|---------------|--------------------|
| Valid Already have taken it   | 16        | 30.2    | 32.7          | 32.7               |
| Valid May be                  | 6         | 11.3    | 12.2          | 44.9               |
| Valid No                      | 13        | 24.5    | 26.5          | 71.4               |
| Valid Only if job requirement | 4         | 7.5     | 8.2           | 79.6               |
| Valid Yes                     | 10        | 18.9    | 20.4          | 100.0              |
| Total                         | 49        | 92.5    | 100.0         |                    |
| Missing System                | 4         | 7.5     |               |                    |
| Total                         | 53        | 100.0   |               |                    |

56.6% said that they want vaccine for their own good health

**Reason for Taking 3rd Booster**

|                                   | Frequency | Percent | Valid Percent | Cumulative Percent |
|-----------------------------------|-----------|---------|---------------|--------------------|
| Valid Job requirement             | 1         | 1.9     | 2.3           | 2.3                |
| Valid Protection of colleagues    | 3         | 5.7     | 7.0           | 9.3                |
| Valid Protection of family health | 4         | 7.5     | 9.3           | 18.6               |
| Valid Protection of my own health | 30        | 56.6    | 69.8          | 88.4               |
| Valid Travel requirement          | 5         | 9.4     | 11.6          | 100.0              |
| Total                             | 43        | 81.1    | 100.0         |                    |
| Missing System                    | 10        | 18.9    |               |                    |

|       |    |       |  |  |
|-------|----|-------|--|--|
| Total | 53 | 100.0 |  |  |
|-------|----|-------|--|--|

#### Encouragement to Get Vaccination

|         |                                                   | Frequency | Percent | Valid Percent | Cumulative Percent |
|---------|---------------------------------------------------|-----------|---------|---------------|--------------------|
|         | Free vaccination                                  | 23        | 43.4    | 46.9          | 46.9               |
| Valid   | Only if compulsory requirement for work or travel | 26        | 49.1    | 53.1          | 100.0              |
|         | Total                                             | 49        | 92.5    | 100.0         |                    |
| Missing | System                                            | 4         | 7.5     |               |                    |
| Total   |                                                   | 53        | 100.0   |               |                    |

50.9% thinks that vaccine is beneficial

#### Thoughts on Benefit

|         |          | Frequency | Percent | Valid Percent | Cumulative Percent |
|---------|----------|-----------|---------|---------------|--------------------|
|         | Not Sure | 19        | 35.8    | 38.8          | 38.8               |
|         | No       | 3         | 5.7     | 6.1           | 44.9               |
| Valid   | Yes      | 27        | 50.9    | 55.1          | 100.0              |
|         | Total    | 49        | 92.5    | 100.0         |                    |
| Missing | System   | 4         | 7.5     |               |                    |
| Total   |          | 53        | 100.0   |               |                    |

67.9% says vaccine is beneficial

#### fficacy of Vaccine

|         |          | Frequency | Percent | Valid Percent | Cumulative Percent |
|---------|----------|-----------|---------|---------------|--------------------|
|         | Not Sure | 11        | 20.8    | 22.4          | 22.4               |
|         | No       | 2         | 3.8     | 4.1           | 26.5               |
| Valid   | Yes      | 36        | 67.9    | 73.5          | 100.0              |
|         | Total    | 49        | 92.5    | 100.0         |                    |
| Missing | System   | 4         | 7.5     |               |                    |
| Total   |          | 53        | 100.0   |               |                    |

54.7% were self motivated to get a vaccine

**Motivation to get vaccine**

|         |                 | Frequency | Percent | Valid Percent | Cumulative Percent |
|---------|-----------------|-----------|---------|---------------|--------------------|
| Valid   | Family          | 16        | 30.2    | 32.7          | 32.7               |
|         | Job requirement | 3         | 5.7     | 6.1           | 38.8               |
|         | My Care Giver   | 1         | 1.9     | 2.0           | 40.8               |
|         | Myself          | 29        | 54.7    | 59.2          | 100.0              |
|         | Total           | 49        | 92.5    | 100.0         |                    |
| Missing | System          | 4         | 7.5     |               |                    |
| Total   |                 | 53        | 100.0   |               |                    |

**Recommendation to Others**

|         |                | Frequency | Percent | Valid Percent | Cumulative Percent |
|---------|----------------|-----------|---------|---------------|--------------------|
| Valid   | No             | 4         | 7.5     | 8.2           | 8.2                |
|         | Only if needed | 15        | 28.3    | 30.6          | 38.8               |
|         | Yes            | 30        | 56.6    | 61.2          | 100.0              |
|         | Total          | 49        | 92.5    | 100.0         |                    |
| Missing | System         | 4         | 7.5     |               |                    |
| Total   |                | 53        | 100.0   |               |                    |

**Booster for Children**

|         |                  | Frequency | Percent | Valid Percent | Cumulative Percent |
|---------|------------------|-----------|---------|---------------|--------------------|
| Valid   | No               | 16        | 30.2    | 32.7          | 32.7               |
|         | Natural Immunity | 24        | 45.3    | 49.0          | 81.6               |
|         | Yes              | 9         | 17.0    | 18.4          | 100.0              |
|         | Total            | 49        | 92.5    | 100.0         |                    |
| Missing | System           | 4         | 7.5     |               |                    |
| Total   |                  | 53        | 100.0   |               |                    |

54.7% recommended and endorsed compulsory vaccine policy among students

**Vaccination\_compulsion\_students**

|         |                  | Frequency | Percent | Valid Percent | Cumulative Percent |
|---------|------------------|-----------|---------|---------------|--------------------|
| Valid   | No               | 5         | 9.4     | 10.2          | 10.2               |
|         | Ethical Approval | 15        | 28.3    | 30.6          | 40.8               |
|         | Yes              | 29        | 54.7    | 59.2          | 100.0              |
|         | Total            | 49        | 92.5    | 100.0         |                    |
| Missing | System           | 4         | 7.5     |               |                    |
| Total   |                  | 53        | 100.0   |               |                    |

41.5% thinks that vaccine is not suitable for pregnant

**Vaccination for Pregnants**

|         |          | Frequency | Percent | Valid Percent | Cumulative Percent |
|---------|----------|-----------|---------|---------------|--------------------|
| Valid   | Not Sure | 22        | 41.5    | 44.9          | 44.9               |
|         | No       | 15        | 28.3    | 30.6          | 75.5               |
|         | Yes      | 12        | 22.6    | 24.5          | 100.0              |
|         | Total    | 49        | 92.5    | 100.0         |                    |
| Missing | System   | 4         | 7.5     |               |                    |
| Total   |          | 53        | 100.0   |               |                    |

69.8% had no effect on sleep

**Vaccination Effect on Sleep**

|         |                                           | Frequency | Percent | Valid Percent | Cumulative Percent |
|---------|-------------------------------------------|-----------|---------|---------------|--------------------|
| Valid   | Just timely after few weeks it was normal | 7         | 13.2    | 14.3          | 14.3               |
|         | No                                        | 37        | 69.8    | 75.5          | 89.8               |
|         | Yes                                       | 5         | 9.4     | 10.2          | 100.0              |
|         | Total                                     | 49        | 92.5    | 100.0         |                    |
| Missing | System                                    | 4         | 7.5     |               |                    |
| Total   |                                           | 53        | 100.0   |               |                    |

79.6% had no effect on Mental health

**Vaccination Effect MH**

|       |          | Frequency | Percent | Valid Percent | Cumulative Percent |
|-------|----------|-----------|---------|---------------|--------------------|
| Valid | Not Sure | 5         | 9.4     | 10.2          | 10.2               |

|         |        |    |       |       |       |
|---------|--------|----|-------|-------|-------|
|         | No     | 39 | 73.6  | 79.6  | 89.8  |
|         | Yes    | 5  | 9.4   | 10.2  | 100.0 |
|         | Total  | 49 | 92.5  | 100.0 |       |
| Missing | System | 4  | 7.5   |       |       |
| Total   |        | 53 | 100.0 |       |       |

66% favored compulsory vaccination policy

| Compulsory Vaccination Views |                                                                |           |         |               |                    |
|------------------------------|----------------------------------------------------------------|-----------|---------|---------------|--------------------|
|                              |                                                                | Frequency | Percent | Valid Percent | Cumulative Percent |
| Valid                        | It was a good decision                                         | 35        | 66.0    | 71.4          | 71.4               |
|                              | It was hard for me to imply by all rules                       | 8         | 15.1    | 16.3          | 87.8               |
|                              | No it was bad decision as people should have freedom of choice | 6         | 11.3    | 12.2          | 100.0              |
|                              | Total                                                          | 49        | 92.5    | 100.0         |                    |
| Missing                      | System                                                         | 4         | 7.5     |               |                    |
| Total                        |                                                                | 53        | 100.0   |               |                    |
