# Supplementary material for: Attitude and Acceptance towards COVID-19 Booster Doses among Literacy Advantaged Population in Pakistan: A Cross-Sectional Study
Source: MDPI journal article supplement (doi:10.3390/vaccines11071238), 2023-07-14
Supplement: s1 [file s1]

STROBE Statement—Checklist of items that should be included in reports of *cross-sectional studies*

|                           |    |   |
|---------------------------|----|---|
| <b>Title and abstract</b> | 1  | ✓ |
| <b>Introduction</b>       |    |   |
| Background/rationale      | 2  | ✓ |
| Objectives                | 3  | ✓ |
| <b>Methods</b>            |    |   |
| Study design              | 4  | ✓ |
| Setting                   | 5  | ✓ |
| Participants              | 6  | ✓ |
| Variables                 | 7  | ✓ |
| Data sources/ measurement | 8  | ✓ |
| Bias                      | 9  | ✓ |
| Study size                | 10 | ✓ |
| Quantitative variables    | 11 | ✓ |
| Statistical methods       | 12 | ✓ |
| <b>Results</b>            |    |   |
| Participants              | 13 | ✓ |
| Descriptive data          | 14 | ✓ |
|                           |    | ✓ |
| Outcome data              | 15 | ✓ |
| Main results              | 16 | ✓ |
| <b>Discussion</b>         |    |   |
| Key results               | 18 | ✓ |
| Limitations               | 19 | ✓ |
| Interpretation            | 20 | ✓ |
| <b>Other information</b>  |    |   |
| Funding                   | 21 | ✓ |
